# Supplementary material for: Gene Transfers Shaped the Evolution of De Novo NAD+ Biosynthesis in Eukaryotes
Source: PubMed Central journal article supplement (PMC4217691; doi:10.1093/gbe/evu185), 2014-08-27
Supplement: supp_evu185_NAD_Biosynth_Suppl.pdf [file supp_evu185_NAD_Biosynth_Suppl.pdf]

## Supplementary Material

Gene transfers shaped the evolution of *de novo* NAD<sup>+</sup> biosynthesis  
in eukaryotes

**Chad M. Ternes and Gerald Schönknecht\***

Department of Botany, Oklahoma State University, Stillwater, OK 74078, USA

\*Author for Correspondence: Gerald Schönknecht, Department of Botany, Oklahoma State  
University, phone: +1-405-744-5549, fax: +1-405-744-1797, [gerald.schoenknecht@okstate.edu](mailto:gerald.schoenknecht@okstate.edu)

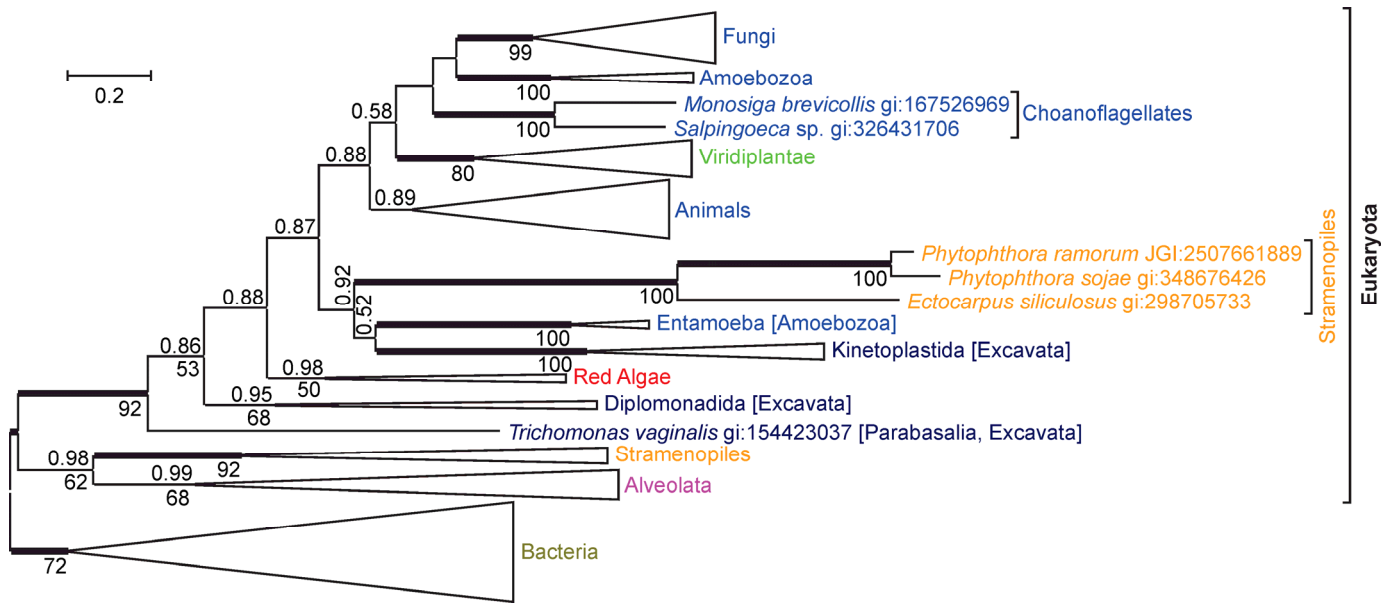

**FIG. S1.** An evolutionary tree for nicotinate-nucleotide adenylyltransferase shows the expected separation of bacterial and eukaryotic sequences. The unrooted Bayesian tree was generated using the VT+G model of protein evolution with posterior probabilities above the branches and PhyML bootstrap values (LG+G) displayed as percentages below the branches. A score of 3 to 9 instead of 5 to 9 was used to extract multiple sequence alignments. Thickened horizontal lines represent 1.0 Bayesian posterior probability. Larger clades have been collapsed for presentation and size is indicative of the number of taxa within the clade. Color coding of major phylogenetic groups as in fig. 2 (Bacteria, Unikonta, Excavata, Stramenopiles, Alveolata, Viridiplantae, Red Algae). Scale bar represents 0.2 substitutions per site.

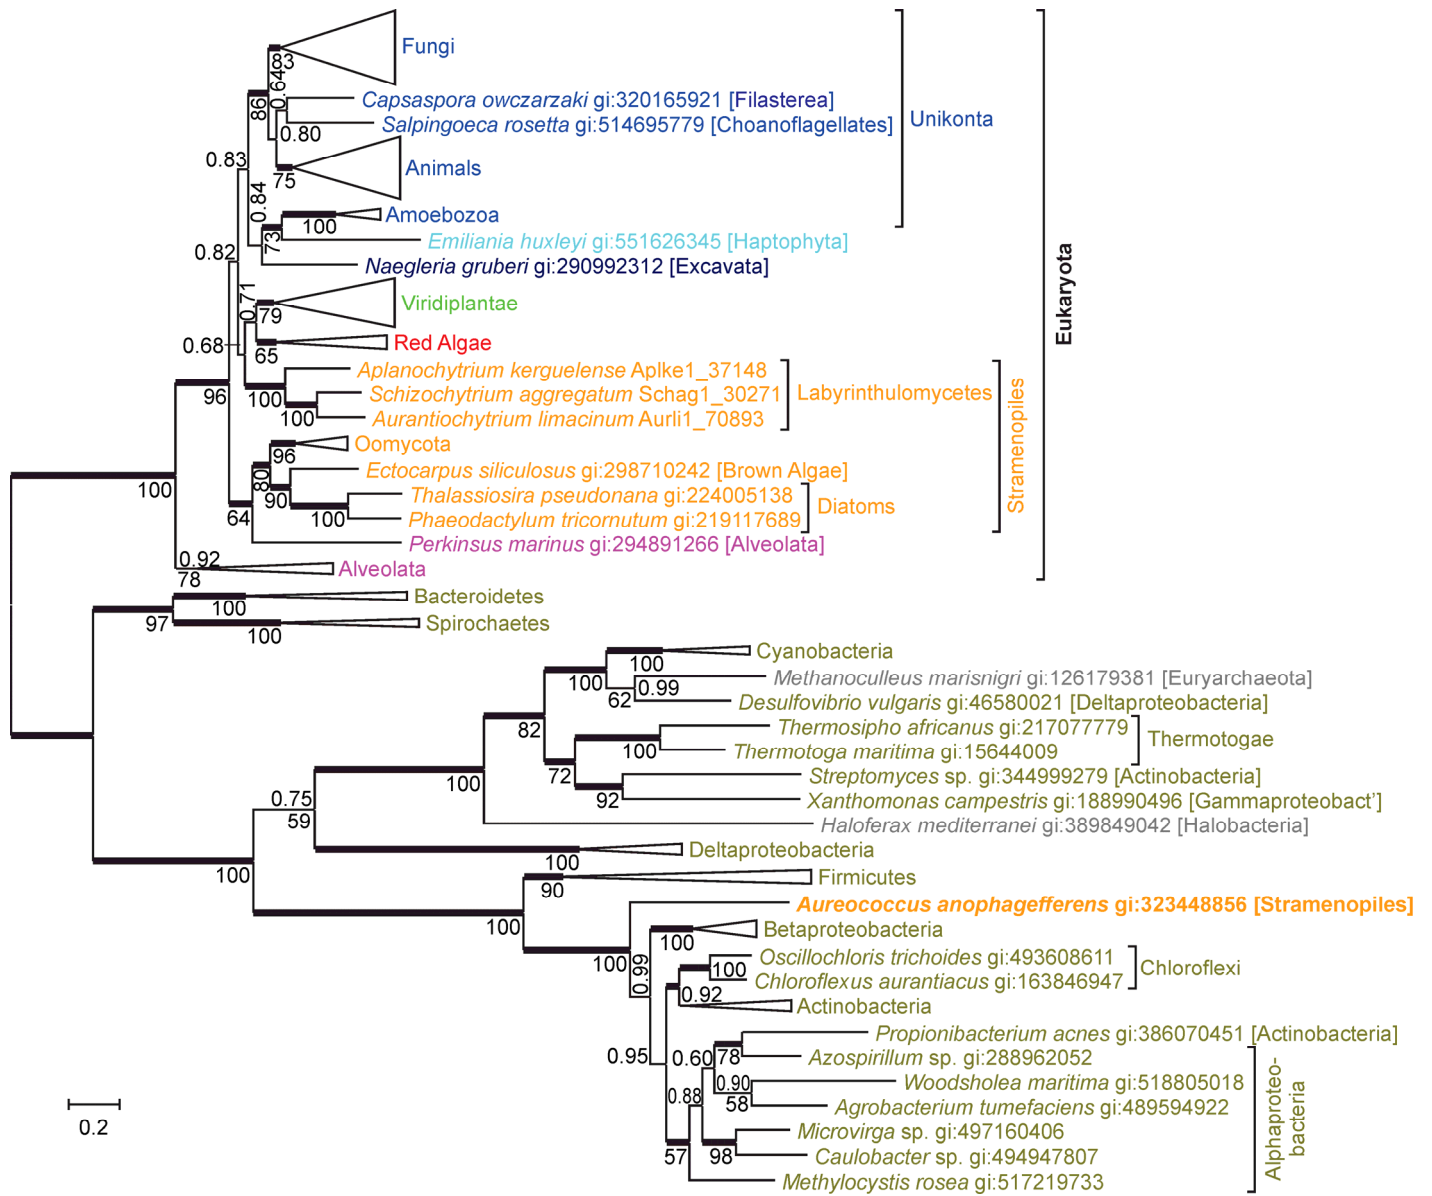

**FIG. S2.** An evolutionary tree for NAD<sup>+</sup> synthases indicates that *A. anophagefferens* acquired a gene via horizontal gene transfer from a bacterium. The unrooted Bayesian tree shows posterior probabilities above the branches and PhyML bootstrap values (LG+I+G+F) below the branches. Thickened horizontal lines represent 1.0 Bayesian posterior probability. Trees with significantly lower log-likelihoods were obtained when monophyly was enforced for all sequences from Eukaryota, or from Bacteria (supplementary table 1, Supplementary Material online).

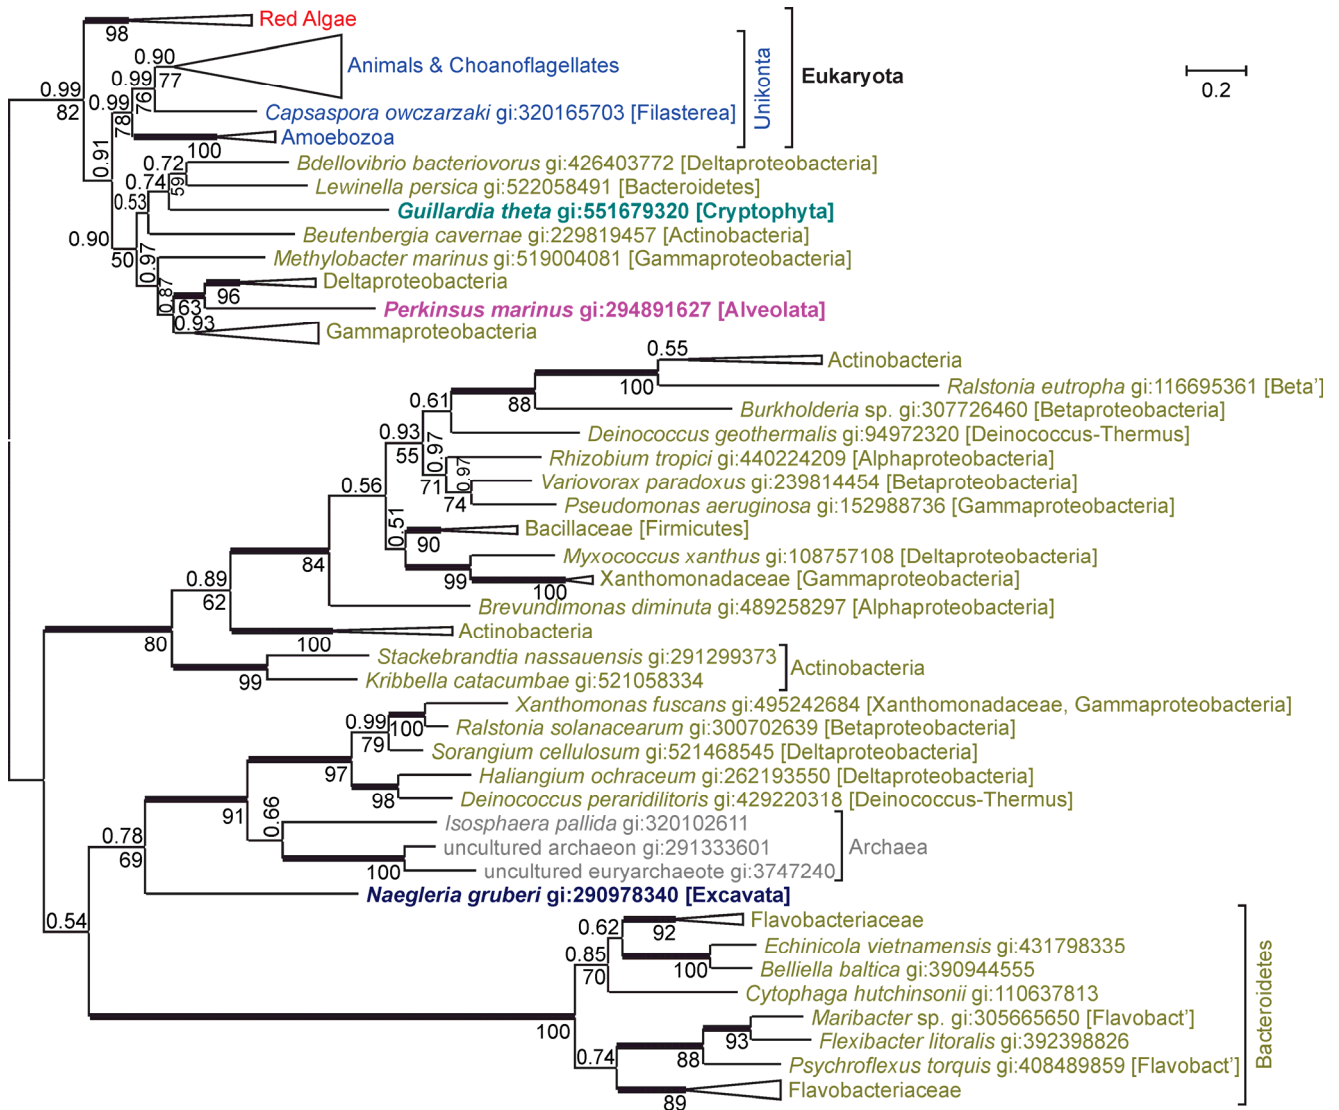

**FIG S3.** An evolutionary tree for tryptophan-2,3-dioxygenase indicates that *N. gruberi* acquired a gene via horizontal gene transfer. The unrooted Bayesian tree shows posterior probabilities above the branches and PhyML bootstrap values below the branches. A score of 3 to 9 instead of 5 to 9 was used to extract multiple sequence alignments. Thickened horizontal lines represent 1.0 Bayesian posterior probability. A tree with practically identical log-likelihoods was obtained when monophyly was enforced for all sequences from Unikonta plus red algae. Trees with significantly lower log-likelihoods were obtained when monophyly was enforced for all sequences from Eukaryota, or from Unikonta plus red algae plus *N. gruberi* (supplementary table 1, Supplementary Material online).

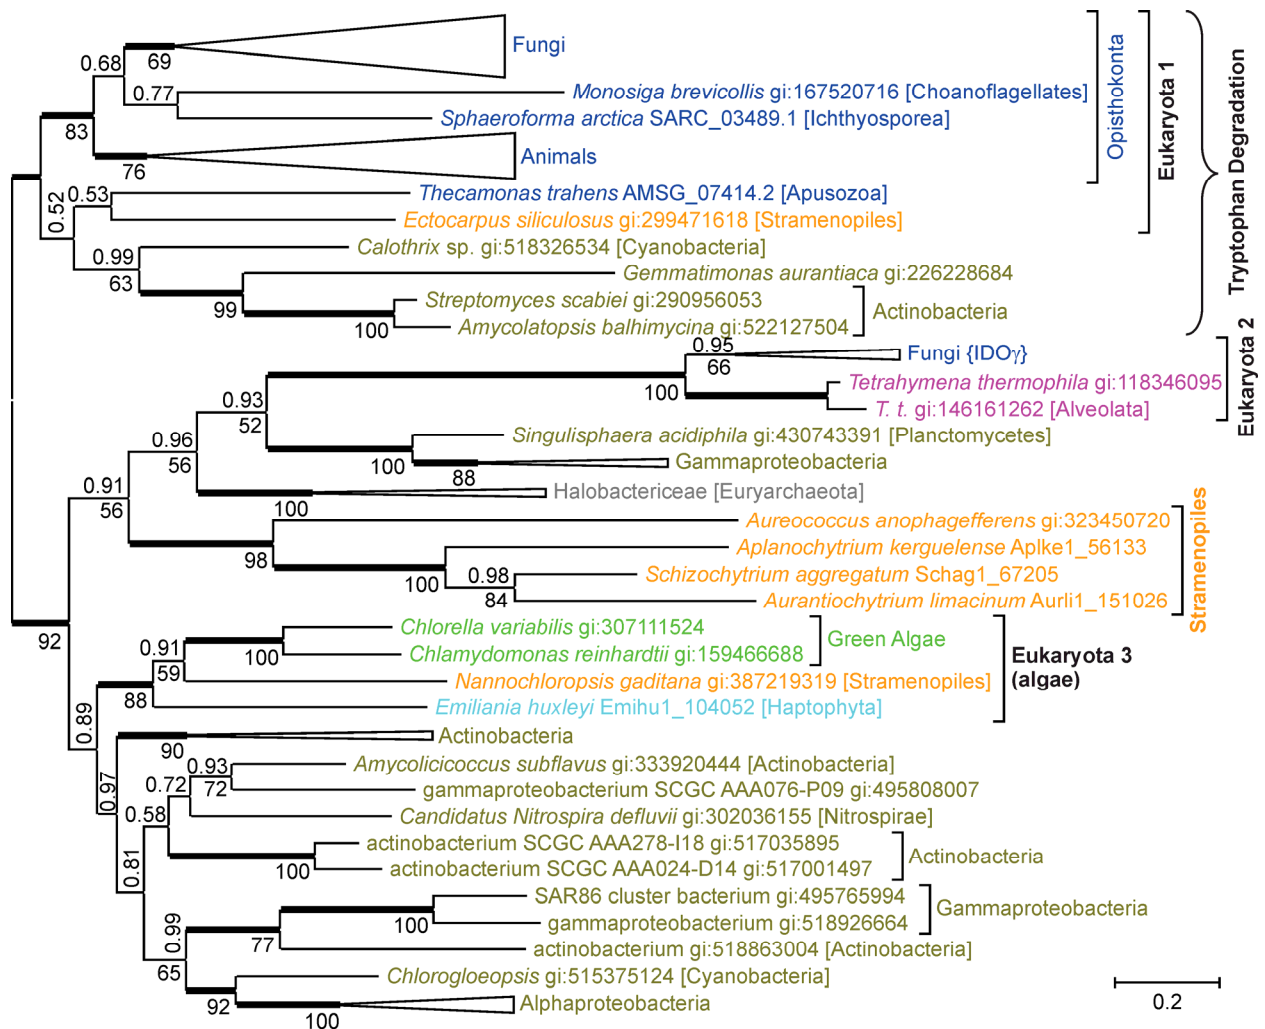

**FIG. S4.** An evolutionary tree for indoleamine-2,3-dioxygenase shows a complex mixture of bacterial and eukaryotic sequences. The unrooted Bayesian tree shows posterior probabilities above the branches and PhyML bootstrap values below the branches. Thickened horizontal lines represent 1.0 Bayesian posterior probability. Trees with significantly lower log-likelihoods were obtained when monophyly was enforced for all sequences from Eukaryota, or from Bacteria (supplementary table 1, Supplementary Material online). Curly brackets refer to enzymatic activity; only enzymes from the upper branch show reaction rates as expected for effective tryptophan degradation, while fungal indoleamine-2,3-dioxygenase  $\gamma$  (IDO $\gamma$ ) and some bacterial enzymes in the lower two branches have very low reaction rates (Yuasa and Ball 2012; Yuasa, et al. 2011).

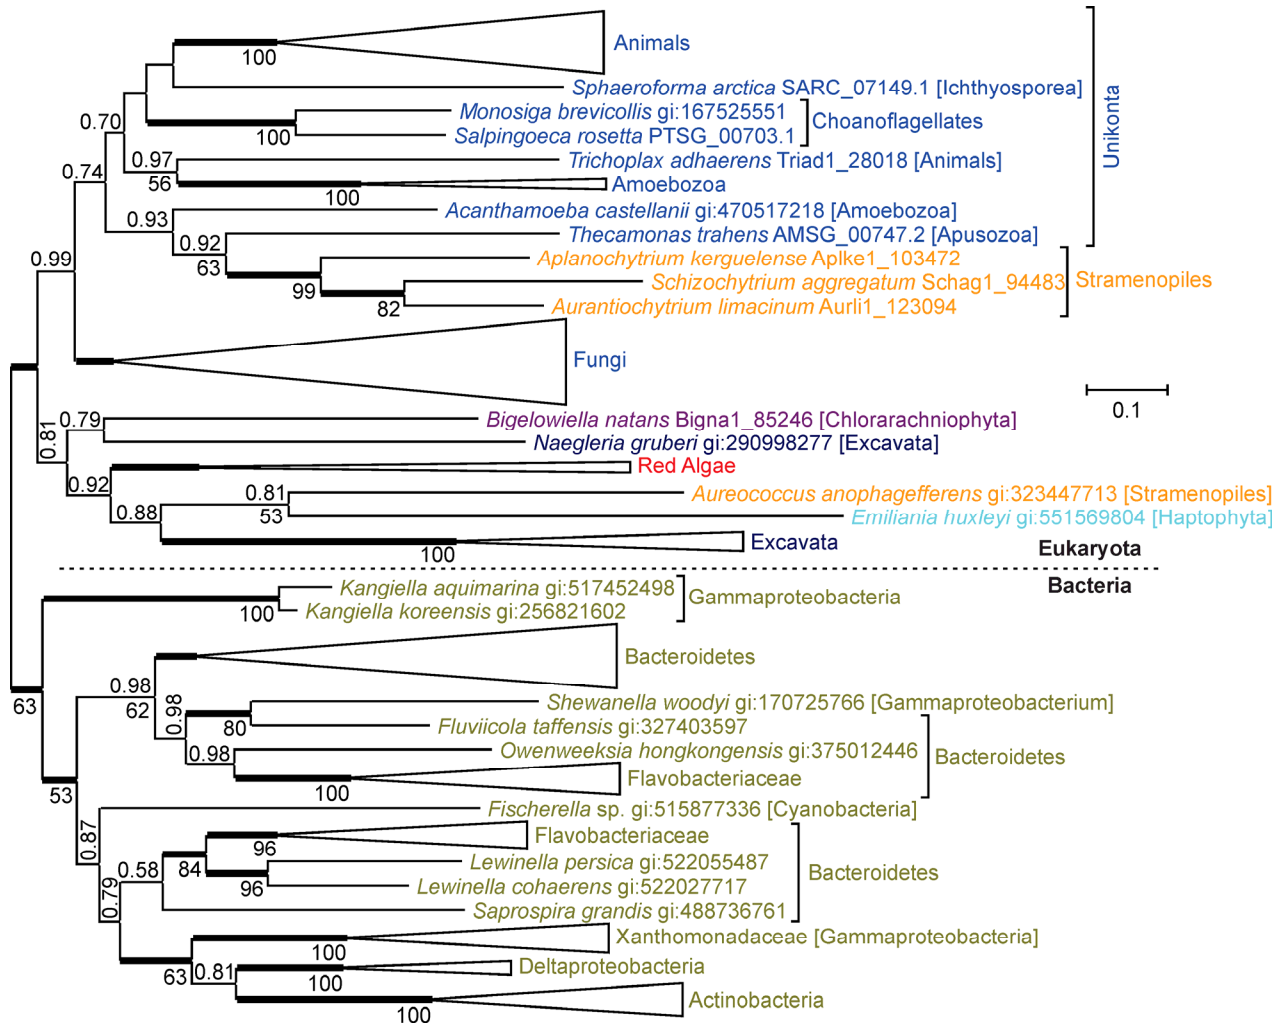

**FIG. S5.** An evolutionary tree of kynureninases shows the expected separation of eukaryotic and bacterial sequences. The unrooted Bayesian tree shows posterior probabilities above the branches and PhyML bootstrap values below the branches. Thickened horizontal lines represent 1.0 Bayesian posterior probability.

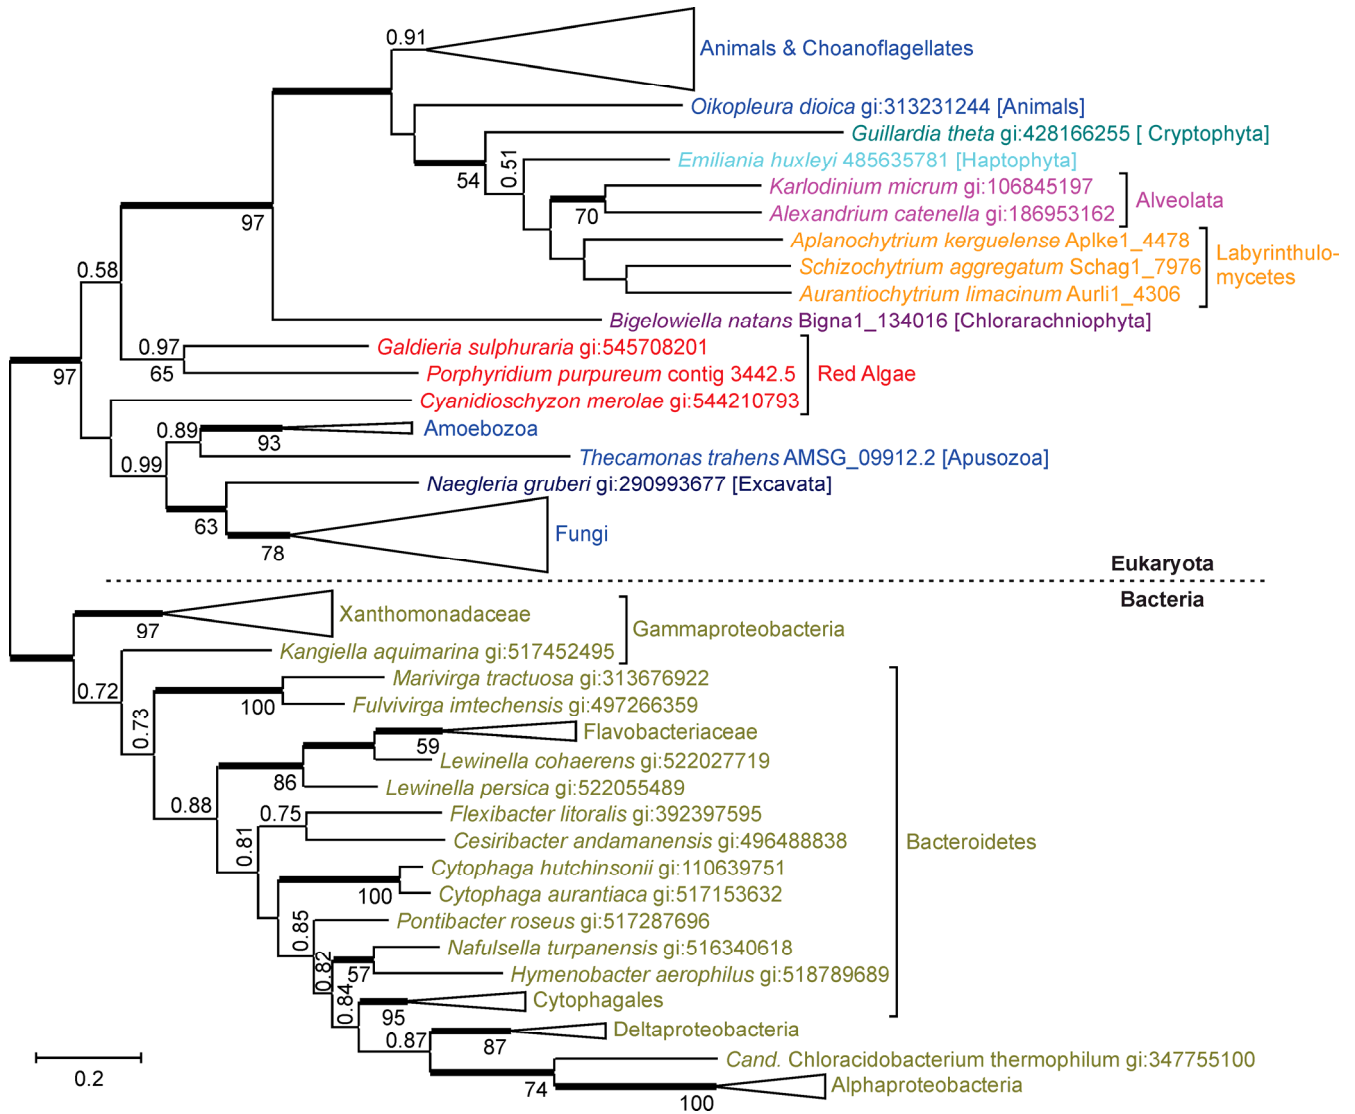

**FIG. S6.** An evolutionary tree of 3-hydroxyanthranilate-3,4-dioxygenases shows the expected separation of eukaryotic and bacterial sequences. The unrooted Bayesian tree shows posterior probabilities above the branches and PhyML bootstrap values below the branches. Thickened horizontal lines represent 1.0 Bayesian posterior probability. The sequence from *Aureococcus anophageferens* was omitted from an evolutionary analysis because it is incomplete.

**Table S1.** Bayesian and Maximum Likelihood analyses of constraint trees. From left to right, clades for which protein sequences were forced to be monophyletic, harmonic mean ( $H$ ) of log-likelihood values from stationary phase of Bayesian analysis as calculated by Tracer (<http://beast.bio.ed.ac.uk/Tracer>), difference between harmonic means of unconstrained and constrained tree ( $\Delta H$ ), Akaike's information criterion through Markov chain Monte Carlo (AICM) as calculated by Tracer, difference in AICM between unconstrained and constrained tree ( $\Delta$ AICM), log-likelihood ( $\log L$ ) of best maximum likelihood tree, difference between log-likelihoods ( $\Delta \log L$ ) of unconstrained and constrained tree,  $p$ -values from approximately unbiased (AU) test and from Kishino-Hasegawa (KH) test as calculated by CONSEL (Shimodaira 2002; Shimodaira and Hasegawa 2001). QS, quinolinate synthase, AO, L-aspartate oxidase.  $\Delta H$ ,  $\Delta$ AICM, and  $p$ -values indicating no significant difference in italics and reduced font size.

| Monophyletic Constraint                        | Bayesian |            |        |               | Maximum Likelihood |                 |              |              |
|------------------------------------------------|----------|------------|--------|---------------|--------------------|-----------------|--------------|--------------|
|                                                | $H$      | $\Delta H$ | AICM   | $\Delta$ AICM | $\log L$           | $\Delta \log L$ | AU           | KH           |
| Aspartate Oxidase                              |          |            |        |               |                    |                 |              |              |
| Eukaryota                                      | -51141   | 323        | 102430 | -634          | -50703             | 314             | 3.0E-06      | 0            |
| Viridiplantae & <i>C. paradoxa</i>             | -51048   | 230        | 102249 | -453          | -50612             | 224             | 2.0E-05      | 0            |
| Viridiplantae & Stramenopiles [as in QS tree]  | -50952   | 135        | 102047 | -251          | -50507             | 118             | 4.0E-06      | 0.0001       |
| Stramenopiles & <i>C. paradoxa</i>             | -50979   | 161        | 102109 | -312          | -50547             | 158             | 7.0E-06      | 9.0E-06      |
| Bacteria                                       | -51153   | 336        | 102460 | -664          | -50717             | 329             | 3E-254       | 0            |
| Archaea                                        | -51148   | 330        | 102452 | -656          | -50434             | 46.2            | <i>0.054</i> | <i>0.058</i> |
| Viridiplantae & Proteobacteria [as in QS tree] | -50943   | 126        | 102043 | -246          | -50397             | 8.2             | <i>0.32</i>  | <i>0.33</i>  |
| Stramenopiles & Proteobacteria [as in QS tree] | -51020   | 202        | 102207 | -411          | -50482             | 93.7            | 4.0E-05      | 0            |
| Stramenopiles & Halobacteriaceae               | -50827   | <i>9.1</i> | 101802 | <i>-5.8</i>   | -50391             | 2.8             | <i>0.274</i> | <i>0.29</i>  |
| Quinolinate Synthase                           |          |            |        |               |                    |                 |              |              |
| Eukaryota                                      | -29507   | 344        | 59159  | -684          | -29175             | 332             | 1.0E-92      | 0            |
| Viridiplantae & <i>C. paradoxa</i>             | -29552   | 389        | 59274  | -800          | -29219             | 375             | 9E-121       | 0            |



|                                                  |        |     |       |       |        |     |         |   |
|--------------------------------------------------|--------|-----|-------|-------|--------|-----|---------|---|
| Bacteria                                         | -29842 | 679 | 59838 | -1363 | -29465 | 621 | 3.0E-29 | 0 |
| Archaea                                          | -29282 | 119 | 58714 | -239  | -28965 | 121 | 1.0E-06 | 0 |
| Viridiplantae & Bacteroidetes [as in AO tree]    | -29577 | 414 | 59312 | -838  | -29247 | 404 | 4E-116  | 0 |
| Stramenopiles & Halobacteriaceae [as in AO tree] | -29407 | 244 | 58975 | -501  | -29083 | 240 | 2.0E-14 | 0 |
| Stramenopiles & Spirochaetes [as in AO tree]     | -29419 | 256 | 59000 | -525  | -29088 | 245 | 3.0E-12 | 0 |

---

Nicotinate-Nucleotide Pyrophosphorylase

|                                                  |        |      |       |       |        |      |         |       |
|--------------------------------------------------|--------|------|-------|-------|--------|------|---------|-------|
| Eukaryota                                        | -38680 | 61.6 | 77583 | -104  | -38283 | 59.9 | 0.019   | 0.018 |
| Viridiplantae & <i>B. natans</i>                 | -38630 | 11.5 | 77485 | -5.5  | -38224 | 1.1  | 0.474   | 0.476 |
| Viridiplantae & Cyanobacteria                    | -38654 | 36.1 | 77555 | -75.7 | -38250 | 27.8 | 0.099   | 0.092 |
| Viridiplantae & Red Algae                        | -38851 | 233  | 77943 | -463  | -38443 | 220  | 4.0E-06 | 0     |
| Viridiplantae & Stramenopiles [as in QS tree]    | -38857 | 238  | 77958 | -478  | -38429 | 206  | 5.0E-15 | 0     |
| <i>B. natans</i> & Stramenopiles                 | -38783 | 165  | 77803 | -323  | -38381 | 159  | 7.0E-08 | 0     |
| Bacteria                                         | -38642 | 23.5 | 77519 | -39.3 | -38253 | 29.9 | 0.077   | 0.072 |
| Opisthokonta                                     | -38641 | 22.9 | 77524 | -43.9 | -38235 | 11.8 | 0.173   | 0.172 |
| Unikonta                                         | -38637 | 19.3 | 77496 | -16.8 | -38235 | 11.8 | 0.172   | 0.174 |
| Red Algae                                        | -38624 | 5.7  | 77478 | 1.2   | -38231 | 8.5  | 0.232   | 0.223 |
| Stramenopiles                                    | -38633 | 15.0 | 77478 | 2.1   | -38226 | 3.4  | 0.417   | 0.424 |
| Stramenopiles & Halobacteriaceae [as in AO tree] | -38686 | 67.9 | 77623 | -143  | -38273 | 49.9 | 0.057   | 0.062 |

---

Nicotinate-Nucleotide Adenylyltransferase

|                           |        |      |       |       |        |      |       |       |
|---------------------------|--------|------|-------|-------|--------|------|-------|-------|
| Amoebozoa                 | -41091 | 15.5 | 82552 | -24.9 | -40058 | 20.2 | 0.016 | 0.030 |
| Excavata                  | -41101 | 25.9 | 82577 | -50.6 | -40051 | 13   | 0.310 | 0.307 |
| Stramenopiles             | -41135 | 59.1 | 82601 | -74.5 | -40086 | 48.2 | 0.004 | 0.006 |
| Unikonta                  | -41089 | 13.1 | 82537 | -10.7 | -40053 | 15.3 | 0.191 | 0.196 |
| Viridiplantae & Red Algae | -41087 | 11.4 | 82550 | -23.3 | -40048 | 10.5 | 0.367 | 0.350 |

|                                                    | NAD <sup>+</sup> Synthase   |      |        |       |         |      |         |       |
|----------------------------------------------------|-----------------------------|------|--------|-------|---------|------|---------|-------|
| Eukaryota                                          | -101181                     | 222  | 202620 | -458  | -100249 | 227  | 0       | 0     |
| Bacteria                                           | -101692                     | 733  | 203653 | -1490 | -100755 | 733  | 0       | 0     |
| Unikonta                                           | -100973                     | 13.9 | 202195 | -32.0 | -100040 | 18.3 | 0.209   | 0.190 |
| Stramenopiles (without <i>A. anophagefferens</i> ) | -101135                     | 176  | 202510 | -348  | -100040 | 17.9 | 0.204   | 0.203 |
| Alveolata                                          | -101000                     | 40.8 | 202213 | -50.1 | -100046 | 24.1 | 0.143   | 0.138 |
|                                                    | Tryptophan 2,3-Dioxygenase  |      |        |       |         |      |         |       |
| Eukaryotes (all)                                   | -40116                      | 68.6 | 80399  | -150  | -39838  | 73.6 | 0.013   | 0.011 |
| Unikonta & Red Algae                               | -40038                      | -8.7 | 80267  | -17.2 | -39769  | 5.1  | 0.370   | 0.357 |
| Unikonta & Red Algae & Naegleria                   | -40095                      | 48.2 | 80374  | -125  | -39817  | 52.6 | 0.001   | 0.001 |
| Unikonta & Red Algae & Perkinsus                   | -40057                      | 10.5 | 80300  | -50.2 | -39791  | 26.6 | 0.077   | 0.081 |
| Unikonta & Red Algae & Guillardia                  | -40044                      | -2.7 | 80257  | -7.1  | -39772  | 8.4  | 0.283   | 0.284 |
| Perkinsus & Guillardia                             | -40051                      | 4.0  | 80282  | -31.8 | -39781  | 16.7 | 0.054   | 0.054 |
| Bacteria                                           | -40206                      | 159  | 80596  | -346  | -39927  | 163  | 6.0E-18 | 0     |
| Gammaproteobacteria                                | -40772                      | 726  | 81733  | -1483 | -40492  | 728  | 9.0E-70 | 0     |
| Deltaproteobacteria                                | -40771                      | 724  | 81690  | -1440 | -40469  | 705  | 2.0E-05 | 0     |
|                                                    | Indoleamine 2,3-Dioxygenase |      |        |       |         |      |         |       |
| Eukaryota                                          | -44187                      | 82.5 | 88534  | -166  | -43890  | 78.8 | 9.0E-05 | 0.001 |
| Bacteria                                           | -44198                      | 93.2 | 88541  | -173  | -43913  | 102  | 6.0E-08 | 0     |
| Stramenopiles & Eukaryota 2                        | -44112                      | 7.9  | 88374  | -6.3  | -43813  | 1.8  | 0.408   | 0.414 |
| Stramenopiles & Eukaryota 2 & Eukaryota 1          | -44150                      | 45.2 | 88459  | -91.2 | -43851  | 40   | 0.026   | 0.030 |
| Stramenopiles & Eukaryota 2 & Eukaryota 3          | -44135                      | 30.9 | 88422  | -54.2 | -43836  | 24.7 | 0.036   | 0.037 |
| Eukaryota 1 & Eukaryota 3                          | -44171                      | 66.7 | 88497  | -129  | -43873  | 62   | 0.0001  | 0.001 |
| <i>E. siliculosus</i> & Eukaryota 3 (algae)        | -44146                      | 41.2 | 88451  | -83.0 | -43853  | 41.8 | 0.001   | 0.001 |

|                                                     |         |       |        |        |        |       |         |        |
|-----------------------------------------------------|---------|-------|--------|--------|--------|-------|---------|--------|
| <i>E. siliculosus</i> & Stramenopiles               | -44120  | 15.6  | 88398  | -30.2  | -43828 | 16.9  | 0.134   | 0.136  |
| Stramenopiles (from all three branches)             | -44164  | 59.4  | 88490  | -122   | -43871 | 59.7  | 0.0001  | 0      |
| Fungi                                               | -44424  | 319   | 89004  | -636   | -44118 | 307   | 4.0E-09 | 0      |
| Kynurenine-3-Monooxygenase                          |         |       |        |        |        |       |         |        |
| Eukaryotes (all)                                    | -581589 | 41.0  | 116502 | -94.6  | -57736 | 45.3  | 0.015   | 0.02   |
| Unikonta without <i>S. artica</i>                   | -581823 | 64.7  | 116546 | -139.3 | -57755 | 64.2  | 0.032   | 0.04   |
| Opisthokonta                                        | -58230  | 112.4 | 116659 | -252.1 | -57819 | 128.0 | 2.0E-06 | 0      |
| SAR & Haptophyta                                    | -58250  | 131.8 | 116712 | -304.5 | -57830 | 139.1 | 3.0E-79 | 0      |
| Stramenopiles                                       | -58438  | 319.7 | 117095 | -687.5 | -58009 | 318.5 | 2.0E-38 | 0      |
| Eukaryota 1 & Eukaryota 2 (marine)                  | -58138  | 20.1  | 116470 | -62.7  | -57723 | 32.4  | 0.003   | 0.013  |
| Amoebozoa & Eukaryota 2 (marine)                    | -58138  | 20.5  | 116443 | -35.5  | -57704 | 13.3  | 0.096   | 0.107  |
| Kynureninase                                        |         |       |        |        |        |       |         |        |
| Unikonta                                            | -73137  | 11.5  | 146577 | -38.6  | -72570 | 9.6   | 0.155   | 0.160  |
| Stramenopiles                                       | -73152  | 27.2  | 146574 | -35.3  | -72588 | 27.7  | 0.103   | 0.102  |
| Excavata                                            | -73131  | 5.4   | 146546 | -7.4   | -72564 | 3     | 0.446   | 0.434  |
| Stramenopiles & <i>B. natans</i> (SAR)              | -73152  | 27.2  | 146574 | -35.3  | -72596 | 34.9  | 0.070   | 0.072  |
| 3-Hydroxyanthranilate-3,4-Dioxygenase               |         |       |        |        |        |       |         |        |
| Unikonta                                            | -25839  | 111   | 51894  | -189   | -25578 | 105   | 4.0E-08 | 0.0003 |
| Opisthokonta                                        | -25843  | 115   | 51926  | -221   | -25584 | 111   | 3.0E-44 | 0      |
| Red Algae                                           | -25737  | 8.8   | 51713  | -8.2   | -25475 | 1.4   | 0.161   | 0.226  |
| Stramenopiles & Alveolates & <i>B. natans</i> (SAR) | -25755  | 26.6  | 51742  | -36.9  | -25497 | 23.7  | 0.046   | 0.051  |

## References

- Shimodaira H. 2002. An approximately unbiased test of phylogenetic tree selection. *Syst Biol* 51: 492-508.
- Shimodaira H, Hasegawa M. 2001. CONSEL: for assessing the confidence of phylogenetic tree selection. *Bioinformatics* 17: 1246-1247.
- Yuasa HJ, Ball HJ. 2012. The evolution of three types of indoleamine 2,3 dioxygenases in fungi with distinct molecular and biochemical characteristics. *Gene* 504: 64-74.
- Yuasa HJ, Ushigoe A, Ball HJ. 2011. Molecular evolution of bacterial indoleamine 2,3-dioxygenase. *Gene* 485: 22-31.
